# Supplementary material
Source: PubMed Central journal article supplement (PMC7936037)
Supplement: web_material_kwaa204.pdf [file web_material_kwaa204.pdf]

## Web Material

### Power of Microbiome Beta-Diversity Analyses Based on Standard Reference Samples

Mitchell H. Gail, Yunhu Wan, and Jianxin Shi

Contents

Web Figures 1–12

Web Tables 1–5

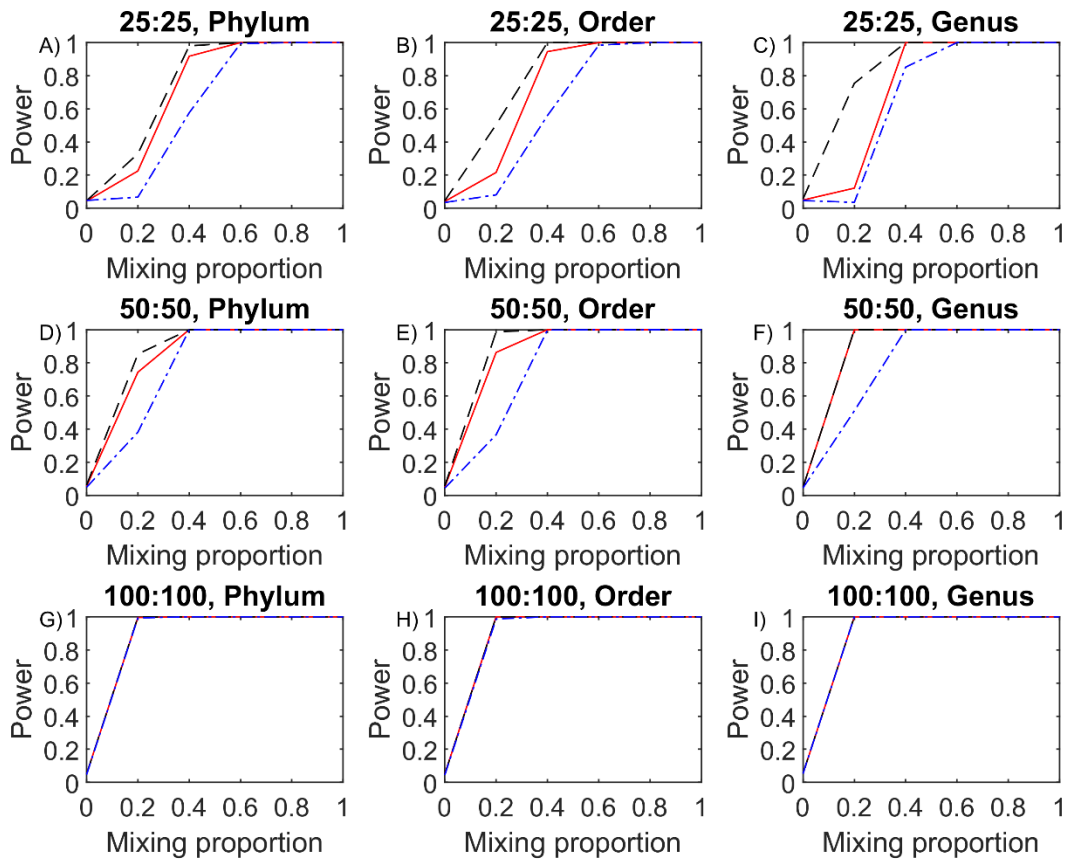

**Web Figure 1.** Power to discriminate skin from saliva samples using Bray-Curtis distance at the phylum, order and genus levels with sample sizes 25, 50 or 100 in each group. The solid (red) locus refers to the standard reference method with the Hotelling  $T^2$  test (or 2df test); the dashed-dot (blue) locus refers to the 5df standard reference test; the dashed (black) locus refers to MiRKAT.

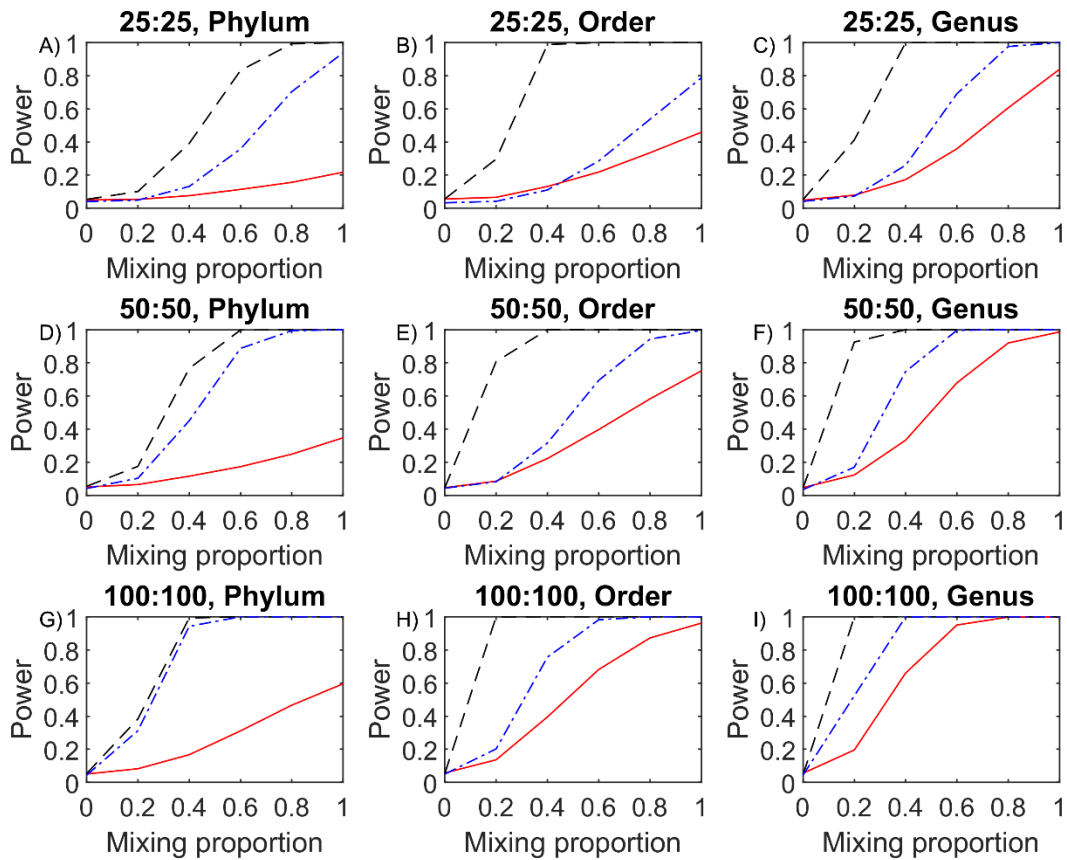

**Web Figure 2.** Power to discriminate skin from saliva samples using Unweighted Unifrac distance at the phylum, order and genus levels with sample sizes 25, 50 or 100 in each group. The solid (red) locus refers to the standard reference method with the Hotelling  $T^2$  test (or  $2df$  test); the dashed-dot (blue) locus refers to the 5df standard reference test; the dashed (black) locus refers to MiRKAT.

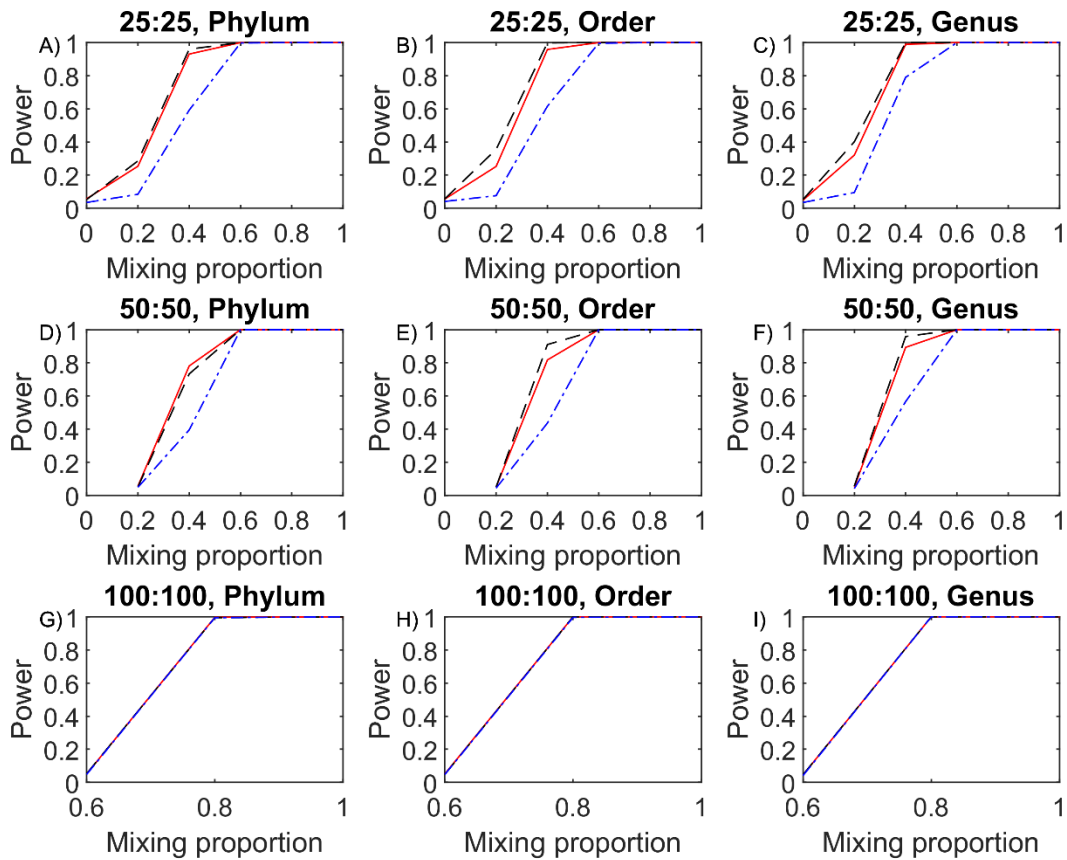

**Web Figure 3.** Power to discriminate skin from saliva samples using Weighted Unifrac distance at the phylum, order and genus levels with sample sizes 25, 50 or 100 in each group. The solid (red) locus refers to the standard reference method with the Hotelling  $T^2$  test (or 2df test); the dashed-dot (blue) locus refers to the 5df standard reference test; the dashed (black) locus refers to MiRKAT.

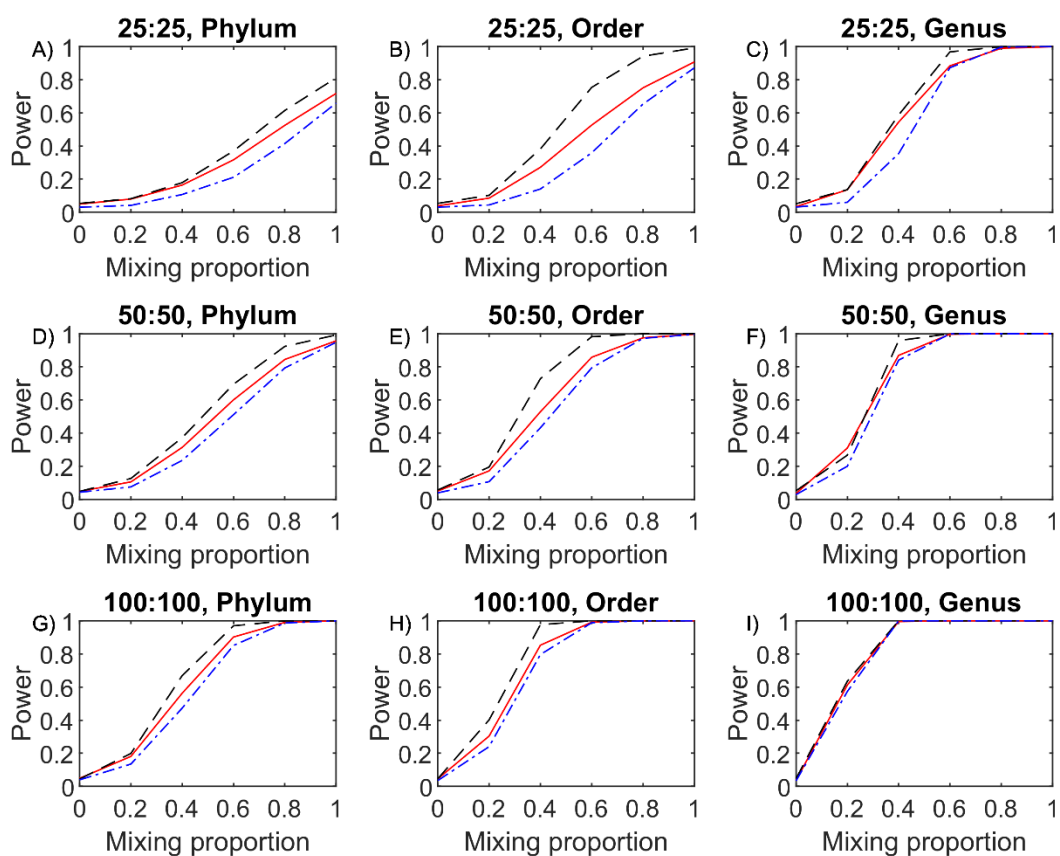

**Web Figure 4.** Power to discriminate skin from nasal samples using Bray-Curtis distance at the phylum, order and genus levels with sample sizes 25, 50 or 100 in each group. The solid (red) locus refers to the standard reference method with the Hotelling  $T^2$  test (or 2df test); the dashed-dot (blue) locus refers to the 5df standard reference test; the dashed (black) locus refers to MiRKAT.

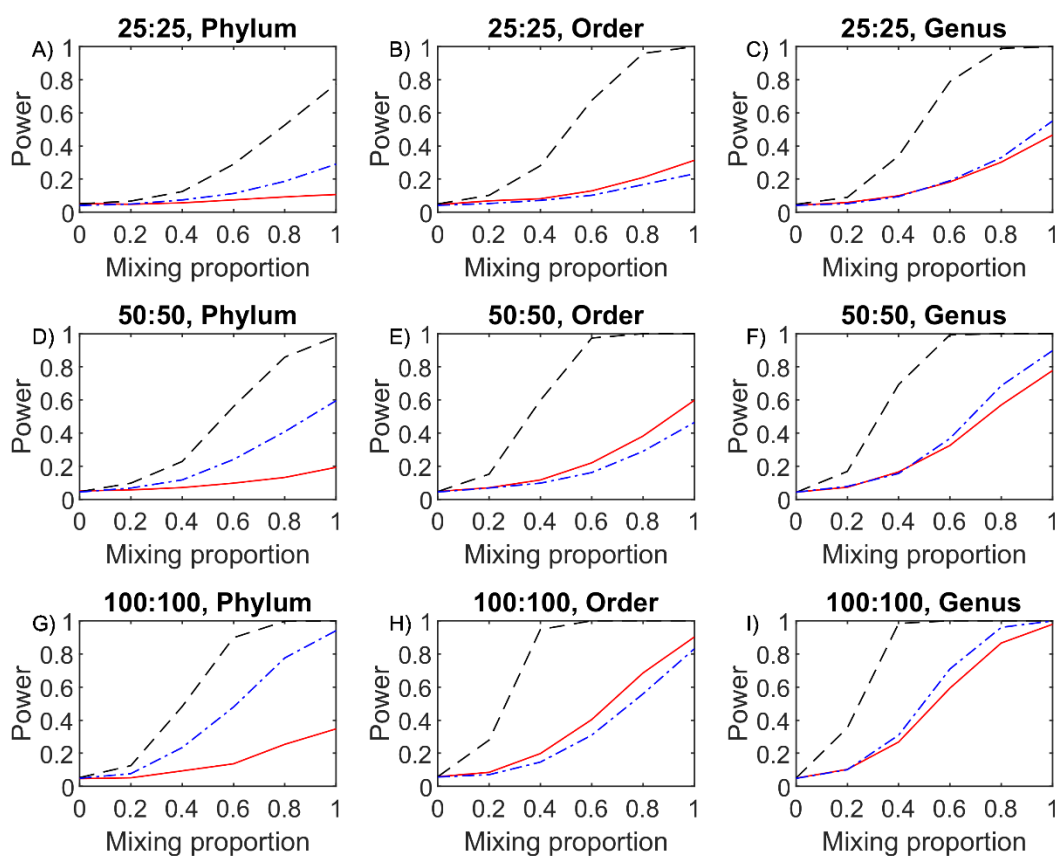

**Web Figure 5.** Power to discriminate skin from nasal samples using Unweighted Unifrac distance at the phylum, order and genus levels with sample sizes 25, 50 or 100 in each group. The solid (red) locus refers to the standard reference method with the Hotelling  $T^2$  test (or 2df test); the dashed-dot (blue) locus refers to the 5df standard reference test; the dashed (black) locus refers to MiRKAT.

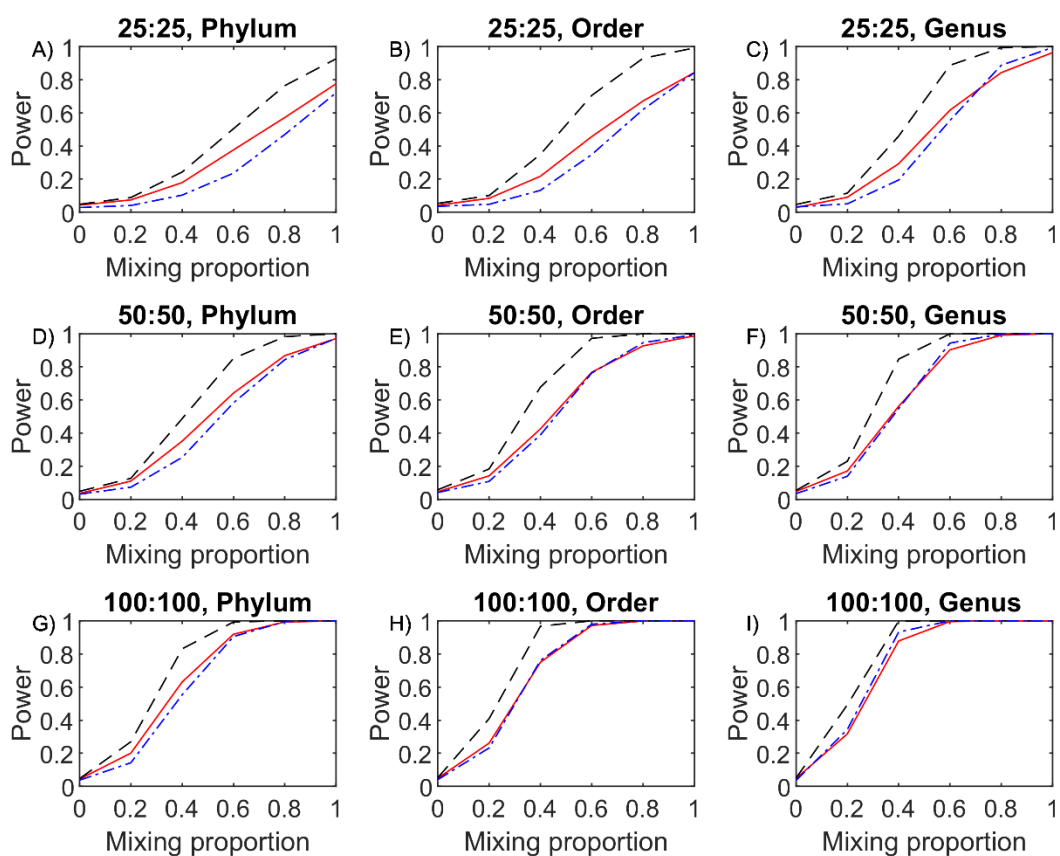

**Web Figure 6.** Power to discriminate skin from nasal samples using Weighted Unifrac distance at the phylum, order and genus levels with sample sizes 25, 50 or 100 in each group. The solid (red) locus refers to the standard reference method with the Hotelling  $T^2$  test (or 2df test); the dashed-dot (blue) locus refers to the 5df standard reference test; the dashed (black) locus refers to MiRKAT.

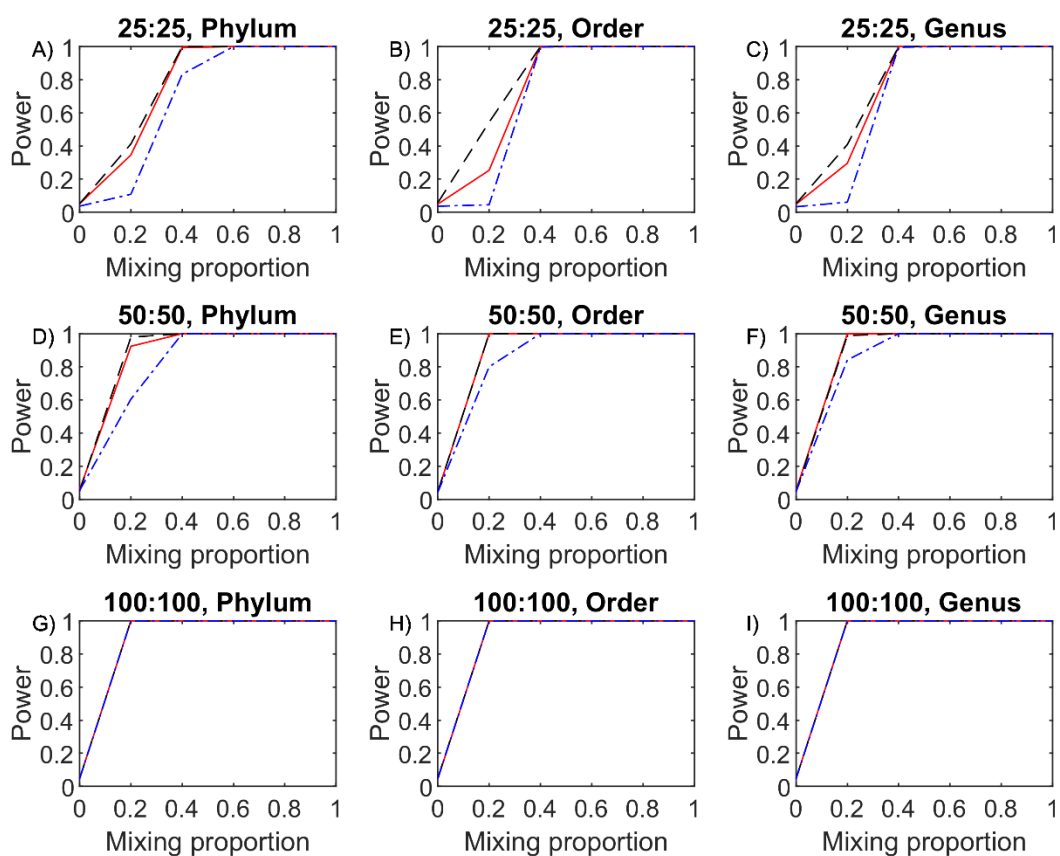

**Web Figure 7.** Power to discriminate skin from stool samples using Bray-Curtis distance at the phylum, order and genus levels with sample sizes 25, 50 or 100 in each group. The solid (red) locus refers to the standard reference method with the Hotelling  $T^2$  test (or 2df test); the dashed-dot (blue) locus refers to the 5df standard reference test; the dashed (black) locus refers to MiRKAT.



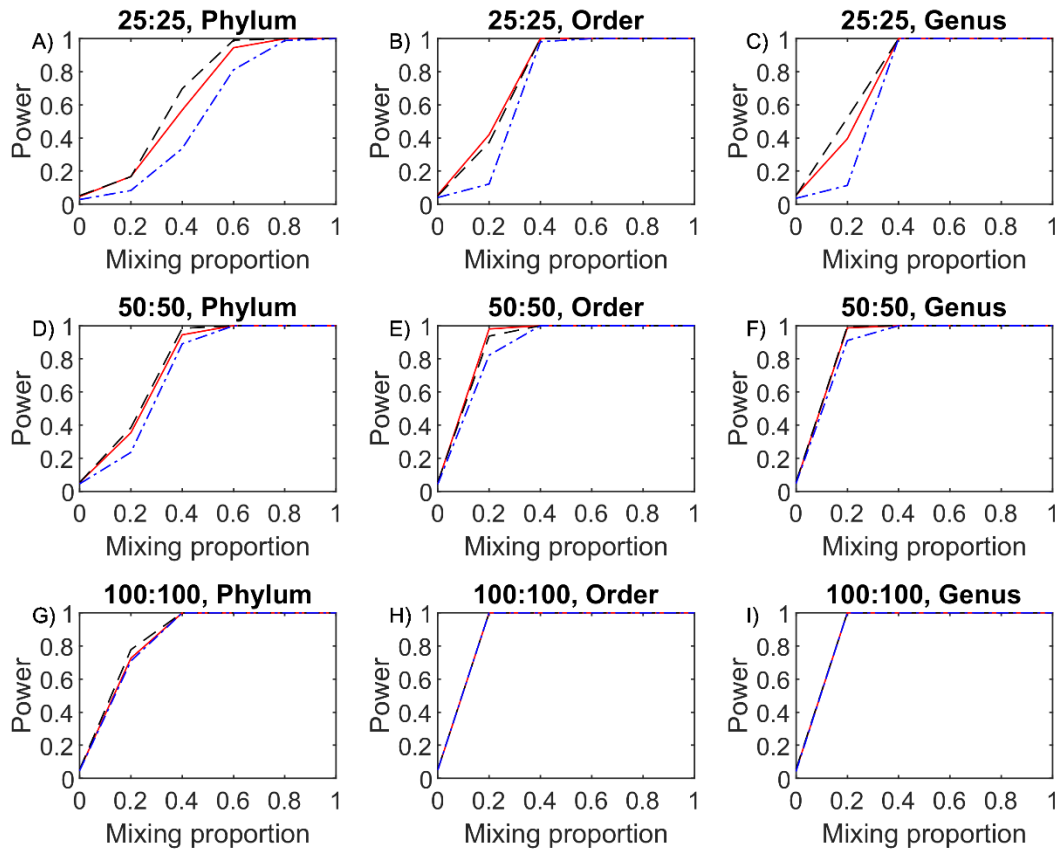

**Web Figure 8.** Power to discriminate skin from stool samples using Unweighted Unifrac distance at the phylum, order and genus levels with sample sizes 25, 50 or 100 in each group. The solid (red) locus refers to the standard reference method with the Hotelling  $T^2$  test (or 2df test); the dashed-dot (blue) locus refers to the 5df standard reference test; the dashed (black) locus refers to MiRKAT.

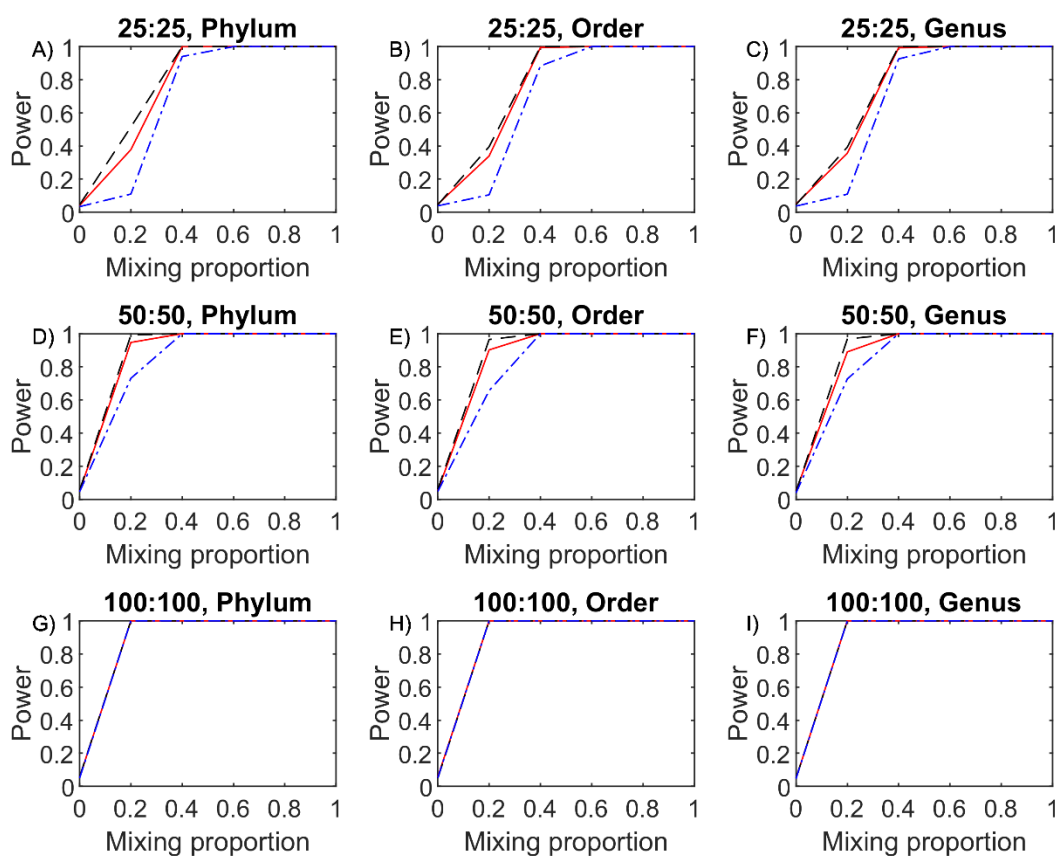

**Web Figure 9.** Power to discriminate skin from stool samples using Weighted Unifrac distance at the phylum, order and genus levels with sample sizes 25, 50 or 100 in each group. The solid (red) locus refers to the standard reference method with the Hotelling  $T^2$  test (or 2df test); the dashed-dot (blue) locus refers to the 5df standard reference test; the dashed (black) locus refers to MiRKAT.

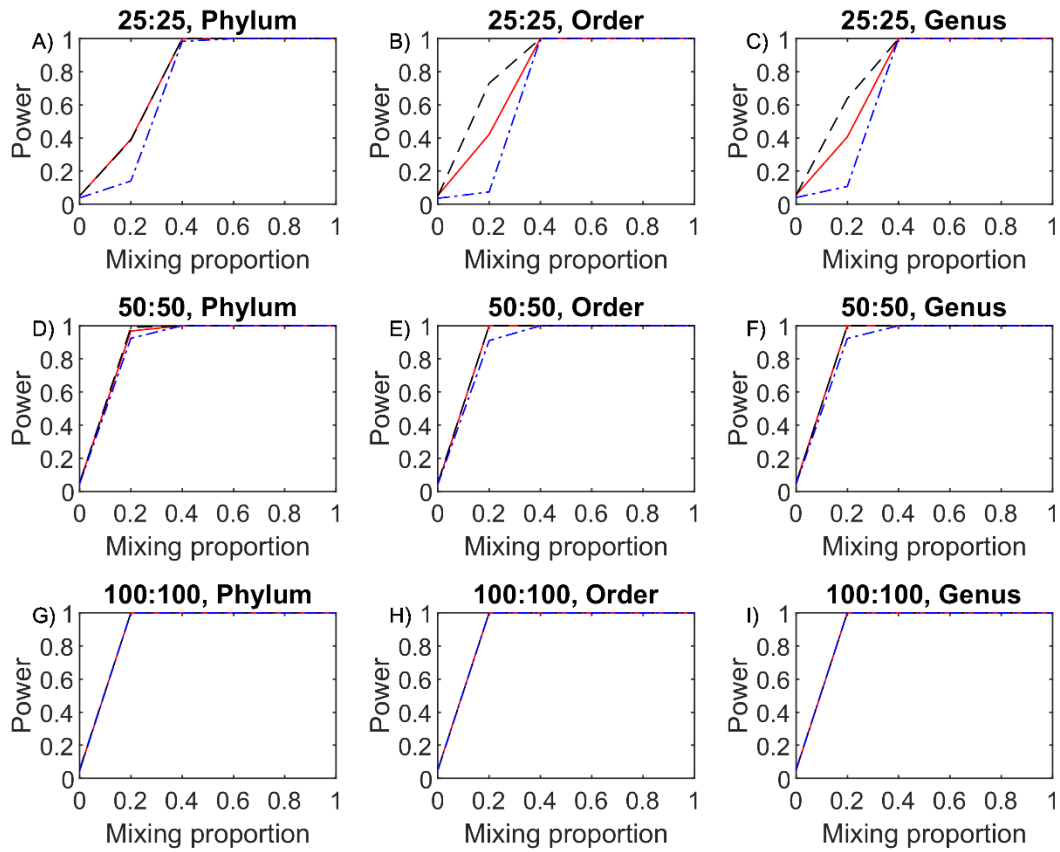

**Web Figure 10.** Power to discriminate stool from nasal samples using Bray-Curtis distance at the phylum, order and genus levels with sample sizes 25, 50 or 100 in each group. The solid (red) locus refers to the standard reference method with the Hotelling  $T^2$  test (or 2df test); the dashed-dot (blue) locus refers to the 5df standard reference test; the dashed (black) locus refers to MiRKAT.

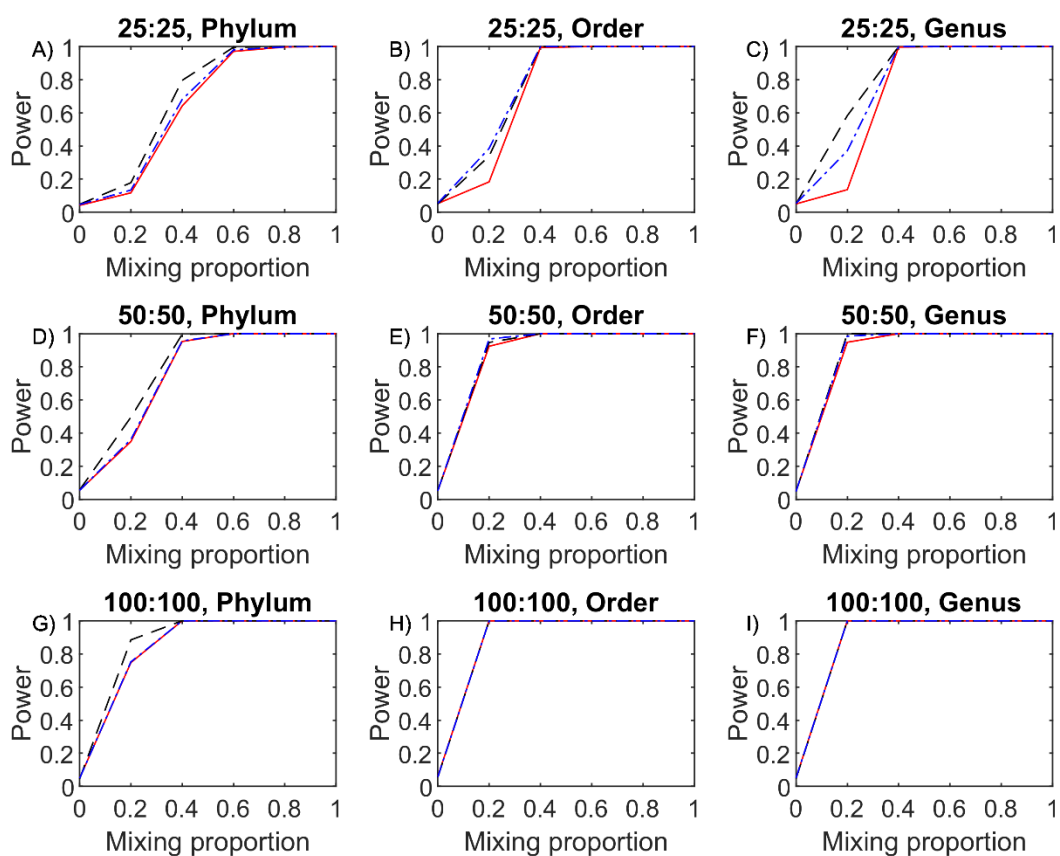

**Web Figure 11.** Power to discriminate stool from nasal samples using Unweighted Unifrac distance at the phylum, order and genus levels with sample sizes 25, 50 or 100 in each group. The solid (red) locus refers to the standard reference method with the Hotelling  $T^2$  test (or 2df test); the dashed-dot (blue) locus refers to the 5df standard reference test; the dashed (black) locus refers to MiRKAT.

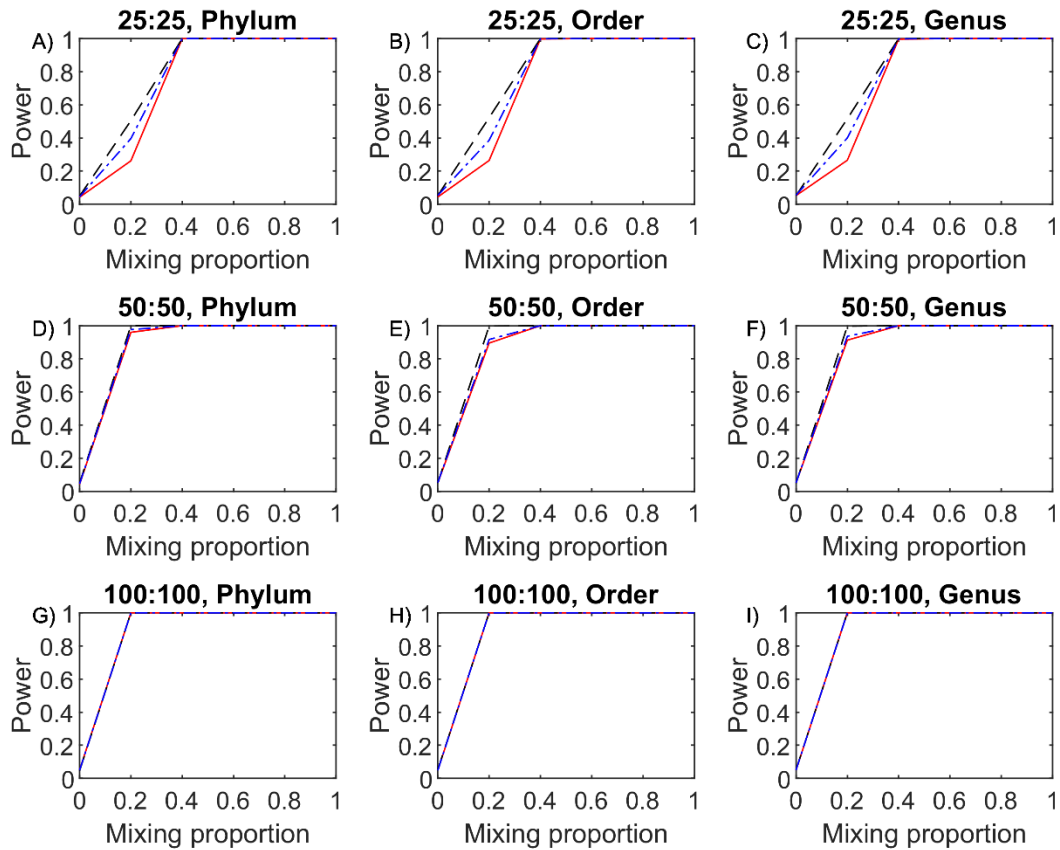

**Web Figure 12.** Power to discriminate stool from nasal samples using Weighted Unifrac distance at the phylum, order and genus levels with sample sizes 25, 50 or 100 in each group. The solid (red) locus refers to the standard reference method with the Hotelling  $T^2$  test (or 2df test); the dashed-dot (blue) locus refers to the 5df standard reference test; the dashed (black) locus refers to MiRKAT.

**Web Table 1.** Phyla read counts from 18 HMP non-reference skin samples with at least 1000 total reads. Only phyla with a least one read in these 18 samples are shown.

| Other | Acido-<br>bacteria | Actino-<br>bacteria | Armati-<br>monadetes | Bacteroi-<br>detes | Chloroflexi | Cyano-<br>bacteria | Euryar-<br>chaeota | Firmicutes | Fuso-<br>bacteria | Gemmati-<br>monadetes | Plancto-<br>mycetes | Proteo-<br>bacteria | Spiro-<br>chaeetes | Synergis-<br>tetes | Teneri-<br>cutes | Thermi | WPS-2 | Total<br>reads |
|-------|--------------------|---------------------|----------------------|--------------------|-------------|--------------------|--------------------|------------|-------------------|-----------------------|---------------------|---------------------|--------------------|--------------------|------------------|--------|-------|----------------|
| 0     | 4                  | 356                 | 0                    | 137                | 23          | 31                 | 0                  | 612        | 4                 | 0                     | 0                   | 1169                | 0                  | 0                  | 0                | 0      | 0     | 2336           |
| 67    | 0                  | 995                 | 31                   | 150                | 0           | 0                  | 30                 | 309        | 128               | 32                    | 0                   | 3331                | 0                  | 0                  | 0                | 43     | 0     | 5116           |
| 0     | 0                  | 1429                | 0                    | 14                 | 0           | 42                 | 0                  | 263        | 4                 | 0                     | 0                   | 112                 | 0                  | 0                  | 0                | 11     | 0     | 1875           |
| 0     | 0                  | 2361                | 0                    | 39                 | 0           | 0                  | 0                  | 192        | 0                 | 0                     | 0                   | 90                  | 0                  | 0                  | 1                | 0      | 0     | 2683           |
| 0     | 0                  | 149                 | 0                    | 100                | 0           | 111                | 0                  | 461        | 95                | 0                     | 0                   | 322                 | 0                  | 0                  | 0                | 0      | 0     | 1238           |
| 0     | 0                  | 951                 | 0                    | 215                | 0           | 7                  | 0                  | 909        | 0                 | 0                     | 0                   | 533                 | 0                  | 0                  | 0                | 0      | 0     | 2615           |
| 0     | 0                  | 2806                | 0                    | 80                 | 0           | 2                  | 0                  | 664        | 1                 | 0                     | 0                   | 97                  | 0                  | 0                  | 0                | 0      | 0     | 3650           |
| 15    | 0                  | 2290                | 0                    | 581                | 0           | 0                  | 0                  | 998        | 8                 | 0                     | 0                   | 880                 | 0                  | 0                  | 32               | 0      | 0     | 4804           |
| 0     | 0                  | 540                 | 0                    | 120                | 0           | 6                  | 0                  | 1691       | 2                 | 0                     | 0                   | 327                 | 0                  | 0                  | 0                | 0      | 0     | 2686           |
| 0     | 0                  | 984                 | 0                    | 67                 | 0           | 19                 | 0                  | 394        | 24                | 0                     | 12                  | 503                 | 0                  | 0                  | 0                | 0      | 0     | 2003           |
| 0     | 0                  | 476                 | 0                    | 67                 | 0           | 0                  | 0                  | 524        | 10                | 0                     | 0                   | 325                 | 0                  | 0                  | 0                | 0      | 0     | 1402           |
| 0     | 0                  | 746                 | 0                    | 20                 | 0           | 0                  | 0                  | 153        | 0                 | 0                     | 0                   | 76                  | 0                  | 0                  | 5                | 0      | 0     | 1000           |
| 0     | 22                 | 592                 | 0                    | 22                 | 0           | 32                 | 0                  | 472        | 11                | 0                     | 0                   | 164                 | 0                  | 0                  | 15               | 0      | 0     | 1330           |
| 0     | 0                  | 4159                | 0                    | 1                  | 0           | 0                  | 0                  | 63         | 0                 | 0                     | 0                   | 58                  | 0                  | 0                  | 0                | 0      | 0     | 4281           |
| 0     | 0                  | 1756                | 0                    | 7                  | 0           | 2                  | 0                  | 394        | 5                 | 0                     | 0                   | 637                 | 0                  | 0                  | 0                | 0      | 0     | 2801           |
| 0     | 0                  | 5336                | 0                    | 20                 | 0           | 35                 | 0                  | 166        | 1                 | 0                     | 0                   | 59                  | 0                  | 0                  | 8                | 0      | 0     | 5625           |
| 2     | 0                  | 1090                | 0                    | 1688               | 0           | 4                  | 0                  | 2288       | 301               | 0                     | 0                   | 405                 | 15                 | 3                  | 8                | 0      | 0     | 5804           |
| 2     | 0                  | 995                 | 0                    | 157                | 0           | 6                  | 0                  | 504        | 19                | 0                     | 0                   | 455                 | 0                  | 0                  | 1                | 0      | 2     | 2141           |

Maximum likelihood parameter estimates from the corresponding Dirichlet multinomial distribution (1) from the CRAN program ‘dirmult’ follow. For the estimated Dirichlet parameters  $\hat{\gamma}_k$ , the values are 0.041066615, 0.019646245, 3.330978815, 0.009685926, 0.521687171, 0.009657488, 0.162877879, 0.009682801, 1.596910805, 0.196879877, 0.009688952, 0.009595361, 1.191197447, 0.009616721, 0.009457715, 0.075094277, 0.019994238, and 0.009413413. In an alternative parameterization, the estimated multinomial probabilities  $\hat{\pi}_k$  are 0.005677570, 0.002716146, 0.460516818, 0.001339105, 0.072124660, 0.001335174, 0.022518307, 0.001338673, 0.220777232, 0.027219175, 0.001339524, 0.001326585, 0.164686264, 0.001329538, 0.001307555, 0.010381987, 0.002764257, and 0.001301430. The estimated overdispersion parameter is  $\hat{\theta} = 0.1214605$ . The overdispersion factor  $\{1 + \theta(n_k - 1)\}$  multiplies the multinomial covariance matrix for  $\hat{\pi}_k$ , where  $n_k$  is the number of reads in the  $k^{\text{th}}$  sample. The 5 randomly phyla whose parameters were modified under the alternative were Bacteroidetes, Cyanobacteria, Fusobacteria, Spirochaetes and Actinobacteria. The first 3 had their  $\gamma_k$  parameters multiplied by  $\psi$  and the last two by  $1/\psi$ .

#### Reference

1. Tvedebrink T. Overdispersion in allelic counts and theta-correction in forensic genetics. *Theor Popul Biol.* 2010;78(3):200-10.

**Web Table 2.** Power to discriminate nasal samples from a mixture of 40% skin and 60% nasal samples<sup>a</sup>

| Phylogenetic level | Sample size in each group | Bray-Curtis      |                  |            | Unweighted Unifrac |     |            | Weighted Unifrac |     |             |
|--------------------|---------------------------|------------------|------------------|------------|--------------------|-----|------------|------------------|-----|-------------|
|                    |                           | 2df <sup>b</sup> | 5df <sup>b</sup> | MiRKAT     | 2df                | 5df | MiRKAT     | 2df              | 5df | MiRKAT      |
| Phylum             | 25                        | .16              | .11              | <b>.18</b> | .06                | .07 | <b>.12</b> | .18              | .10 | <b>.24</b>  |
|                    | 50                        | .31              | .23              | <b>.37</b> | .07                | .12 | <b>.23</b> | .35              | .25 | <b>.49</b>  |
|                    | 100                       | .56              | .47              | <b>.67</b> | .09                | .23 | <b>.48</b> | .63              | .55 | <b>.83</b>  |
| Order              | 25                        | .27              | .14              | <b>.38</b> | .08                | .07 | <b>.28</b> | .22              | .13 | <b>.35</b>  |
|                    | 50                        | .53              | .43              | <b>.73</b> | .12                | .10 | <b>.60</b> | .42              | .39 | <b>.68</b>  |
|                    | 100                       | .85              | .80              | <b>.98</b> | .20                | .15 | <b>.95</b> | .75              | .76 | <b>.97</b>  |
| Genus              | 25                        | .54              | .35              | <b>.59</b> | .10                | .09 | <b>.34</b> | .29              | .19 | <b>.46</b>  |
|                    | 50                        | .87              | .84              | <b>.96</b> | .17                | .16 | <b>.69</b> | .56              | .55 | <b>.85</b>  |
|                    | 100                       | 1.00             | 1.00             | 1.00       | .27                | .31 | <b>.98</b> | .88              | .93 | <b>1.00</b> |

<sup>a</sup>Based on 3000 simulations and rounded to two places. Bold numbers indicate the test with highest power.

<sup>b</sup>The 2df-test is equivalent to a Hotelling T<sup>2</sup> test and is computed by testing for no main associations in a linear regression of group indicator on the mean distances to the two reference samples. The 5df-test tests that there are no main associations and no associations with the two squared mean distances and with their product. See Methods for details.

**Web Table 3.** Power to discriminate stool samples from a mixture of 20% skin and 80% stool samples<sup>a</sup>

| Phylogenetic level | Sample size in each group | Bray-Curtis      |                  |            | Unweighted Unifrac |      |            | Weighted Unifrac |      |            |
|--------------------|---------------------------|------------------|------------------|------------|--------------------|------|------------|------------------|------|------------|
|                    |                           | 2df <sup>b</sup> | 5df <sup>b</sup> | MiRKAT     | 2df                | 5df  | MiRKAT     | 2df              | 5df  | MiRKAT     |
| Phylum             | 25                        | .35              | .11              | <b>.41</b> | .17                | .08  | .17        | .38              | .11  | <b>.51</b> |
|                    | 50                        | .92              | .60              | <b>.98</b> | .35                | .24  | <b>.38</b> | .95              | .73  | <b>.99</b> |
|                    | 100                       | 1.00             | 1.00             | 1.00       | .73                | .71  | <b>.78</b> | 1.00             | 1.00 | 1.00       |
| Order              | 25                        | .25              | .04              | <b>.54</b> | <b>.42</b>         | .12  | .37        | .34              | .11  | <b>.40</b> |
|                    | 50                        | 1.00             | .80              | 1.00       | <b>.98</b>         | .82  | .94        | .90              | .66  | <b>.96</b> |
|                    | 100                       | 1.00             | 1.00             | 1.00       | 1.00               | 1.00 | 1.00       | 1.00             | 1.00 | 1.00       |
| Genus              | 25                        | .30              | .06              | <b>.41</b> | .39                | .11  | <b>.52</b> | .36              | .11  | <b>.39</b> |
|                    | 50                        | <b>1.00</b>      | .84              | .99        | 1.00               | 1.00 | 1.00       | .89              | .73  | <b>.97</b> |
|                    | 100                       | 1.00             | 1.00             | 1.00       | 1.00               | 1.00 | 1.00       | 1.00             | 1.00 | 1.00       |

<sup>a</sup>Based on 3000 simulations and rounded to two places. Bold numbers indicate the test with highest power.

<sup>b</sup>The 2df-test is equivalent to a Hotelling T<sup>2</sup> test and is computed by testing for no main associations in a linear regression of group indicator on the mean distances to the two reference samples. The 5df-test tests that there are no main associations and no associations with the two squared mean distances and with their product. See Methods for details.



**Web Table 4.** Power to discriminate stool samples from a mixture of 20% stool and 80% nasal samples<sup>a</sup>

| Phylogenetic level | Sample size in each group | Bray-Curtis      |                  |            | Unweighted Unifrac |            |             | Weighted Unifrac |      |             |
|--------------------|---------------------------|------------------|------------------|------------|--------------------|------------|-------------|------------------|------|-------------|
|                    |                           | 2df <sup>b</sup> | 5df <sup>b</sup> | MiRKAT     | 2df                | 5df        | MiRKAT      | 2df              | 5df  | MiRKAT      |
| Phylum             | 25                        | .39              | .14              | .39        | .12                | .13        | <b>.18</b>  | .26              | .40  | <b>.50</b>  |
|                    | 50                        | .97              | .92              | <b>.99</b> | .35                | .36        | <b>.50</b>  | .96              | .98  | <b>1.00</b> |
|                    | 100                       | 1.00             | 1.00             | 1.00       | .75                | .75        | <b>.88</b>  | 1.00             | 1.00 | 1.00        |
| Order              | 25                        | .42              | .07              | <b>.73</b> | .18                | <b>.38</b> | .33         | .26              | .39  | <b>.52</b>  |
|                    | 50                        | 1.00             | .91              | 1.00       | .92                | <b>.97</b> | .95         | .90              | .92  | <b>1.00</b> |
|                    | 100                       | 1.00             | 1.00             | 1.00       | 1.00               | 1.00       | 1.00        | 1.00             | 1.00 | 1.00        |
| Genus              | 25                        | .41              | .11              | <b>.64</b> | .14                | .37        | <b>.58</b>  | .27              | .40  | <b>.52</b>  |
|                    | 50                        | 1.00             | .92              | 1.00       | .95                | .98        | <b>1.00</b> | .92              | .94  | <b>1.00</b> |
|                    | 100                       | 1.00             | 1.00             | 1.00       | 1.00               | 1.00       | 1.00        | 1.00             | 1.00 | 1.00        |

<sup>a</sup>Based on 3000 simulations and rounded to two places. Bold numbers indicate the test with highest power.

<sup>b</sup>The 2df-test is equivalent to a Hotelling T<sup>2</sup> test and is computed by testing for no main associations in a linear regression of group indicator on the mean distances to the two reference samples. The 5df-test tests that there are no main associations and no associations with the two squared mean distances and with their product. See Methods for details.

**Web Table 5.** P-values for testing association between BMI and beta diversity in the American Gut Project stool samples

| Taxonomic Level                  | Statistical Test        | Dissimilarity Measure       |                              |                             |
|----------------------------------|-------------------------|-----------------------------|------------------------------|-----------------------------|
|                                  |                         | Bray-Curtis                 | Unweighted Unifrac           | Weighted Unifrac            |
| 6 (Genus) 1186 taxa <sup>a</sup> | 5 df standard reference | <b>0.0012<sup>b</sup></b>   | 0.0117                       | <b>2.03x10<sup>-5</sup></b> |
|                                  | 2 df standard reference | 0.0406                      | 0.6696                       | 0.1924                      |
|                                  | MiRKAT                  | 0.0102                      | <b>0.0020</b>                | 0.0347                      |
| 5(Family) 479 taxa               | 5 df standard reference | <b>0.0054</b>               | 0.0079                       | <b>2.52x10<sup>-5</sup></b> |
|                                  | 2 df standard reference | 0.1197                      | 0.7962                       | 0.2147                      |
|                                  | MiRKAT                  | 0.0067                      | <b>0.0073</b>                | 0.0354                      |
| 4(Order) 257 taxa                | 5 df standard reference | <b>0.0017</b>               | <b>7.059x10<sup>-4</sup></b> | <b>4.79x10<sup>-4</sup></b> |
|                                  | 2 df standard reference | 0.1540                      | 0.4592                       | 0.079                       |
|                                  | MiRKAT                  | 0.0387                      | 0.0385                       | 0.04468                     |
| 3(Class) 124 taxa                | 5 df standard reference | <b>0.0019</b>               | 0.6044                       | <b>5.59x10<sup>-4</sup></b> |
|                                  | 2 df standard reference | 0.1707                      | 0.6387                       | 0.0871                      |
|                                  | MiRKAT                  | 0.0573                      | <b>0.1299</b>                | 0.0528                      |
| 2(Phylum) 44 taxa                | 5 df standard reference | <b>2.14x10<sup>-4</sup></b> | <b>0.0257</b>                | <b>2.36x10<sup>-4</sup></b> |
|                                  | 2 df standard reference | 0.1031                      | 0.6064                       | 0.0846                      |
|                                  | MiRKAT                  | 0.0570                      | 0.1600                       | 0.0474                      |

<sup>a</sup>This is the number of taxa identified in our data with the closed reference library Greengenes 13.8.

<sup>b</sup>Smallest p-value is in bold.
